# Supplementary material
Source: Elsevier journal article supplement (https://www.sciencedirect.com/science/article/pii/S0213005X17302392)
Supplement: mmc1 [file S0213005X17302392:mmc1.docx]

Supplementary Table S1: Quality Assessment (QUADAS) of included studies in meta-analysis.

| **Author** | **Representative patients and correct selection** | **Gold Standard adequate** | **Acceptable delay between test and GS** | **All patients did test and GS** | **All patients did the same GS** | **Test independence of GS** | **Blinded GS** | **Blinded test** | **Uninterpretable results** | **Explained losses** |
| --- | --- | --- | --- | --- | --- | --- | --- | --- | --- | --- |
| Angeletti20 | Y | Y | U | Y | Y | Y | U | U | Y | Y |
| Riederer8 | Y | Y | U | Y | Y | Y | U | U | Y | Y |
| Egli21 | Y | Y | U | Y | Y | Y | U | U | Y | Y |
| Martinez23 | Y | Y | Y | Y | Y | Y | U | U | Y | Y |
| Tadros28 | Y | Y | U | Y | Y | Y | U | U | Y | Y |
| Schieffer24 | Y | Y | N | Y | Y | Y | Y | Y | Y | Y |
| Rodriguez-Sanchez26 | U | Y | U | Y | Y | Y | U | U | Y | Y |
| Gray29 | U | Y | U |  |  |  |  |  |  |  |
| Martiny30 | Y | Y | U | Y | Y | Y | U | U | Y | Y |
| Jamal31 | Y | Y | U | Y | Y | Y | U | U | Y | Y |
| Leli32 | Y | Y | U | Y | Y | Y | U | U | Y | Y |
| Chen33 | Y | Y | U | Y | Y | Y | U | U | Y | Y |
| Nonneman34 | Y | Y | Y | Y | Y | Y | Y | Y | Y | Y |
| March–Rosselló35 | Y | Y | U | Y | Y | Y | U | U | Y | U |
| Clerc36 | Y | Y | U | Y | Y | Y | U | U | Y | Y |
| Hoyos-Mallecot37 | Y | Y | Y | Y | Y | Y | U | U | Y | Y |
| Lagacé-Wiens38 | Y | Y | U | Y | Y | Y | U | U | Y | Y |
| Meex6 | Y | Y | U | Y | Y | Y | U | U | Y | Y |
| Saffert39 | Y | Y | U | Y | Y | Y | U | U | Y | Y |
| Vlek40 | Y | Y | Y | Y | Y | Y | U | U | Y | Y |
| Martiny41 | Y | Y | U | Y | Y | Y | U | U | Y | Y |
| Buchan42 | Y | Y | Y | Y | Y | Y | U | U | Y | Y |
| Loonen43 | Y | Y | U | Y | Y | Y | U | U | Y | Y |
| Klein44 | Y | Y | Y | Y | Y | Y | U | U | Y | Y |
| Juiz16 | Y | Y | Y | Y | Y | Y | U | U | Y | Y |
| Fulsgsam45 | Y | Y | Y | Y | Y | Y | U | U | Y | Y |
| Schubert46 | Y | Y | U | Y | Y | Y | U | U | Y | Y |
| Kok47 | Y | Y | U | Y | Y | Y | U | U | Y | Y |
| Ferreira12 | Y | Y | U | Y | Y | Y | U | U | Y | Y |
| Haigh25 | Y | Y | U | Y | Y | Y | U | U | Y | Y |
| Chebotar22 | Y | Y | U | Y | Y | Y | U | U | Y | Y |
| Mestas27 | Y | Y | U | Y | Y | Y | U | U | Y | Y |
| Y: yes; N: not: U: unclear |  |  |  |  |  |  |  |  |  |  |

Supplementary Figure S2. Funnel plot to investigate publication bias for the selected studies in Gram negative bacteria (A) in Enterobacteriaceae (B) and in Gram negative bacteria (C)

B

A


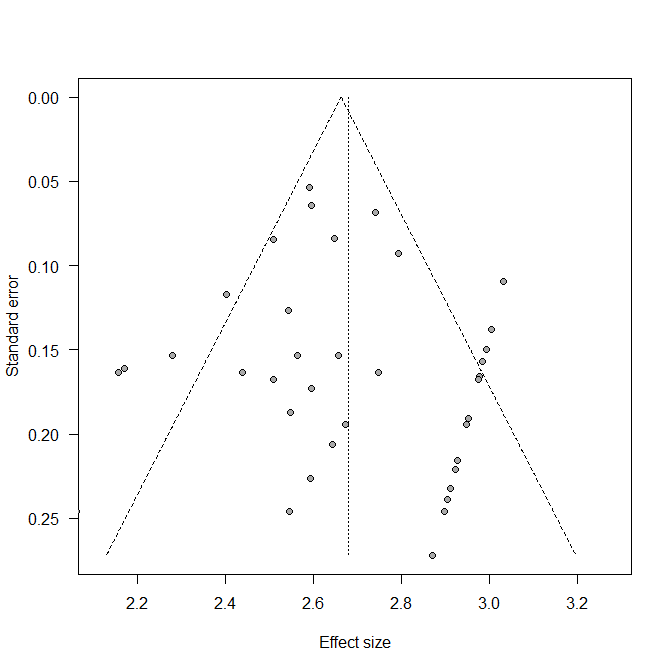

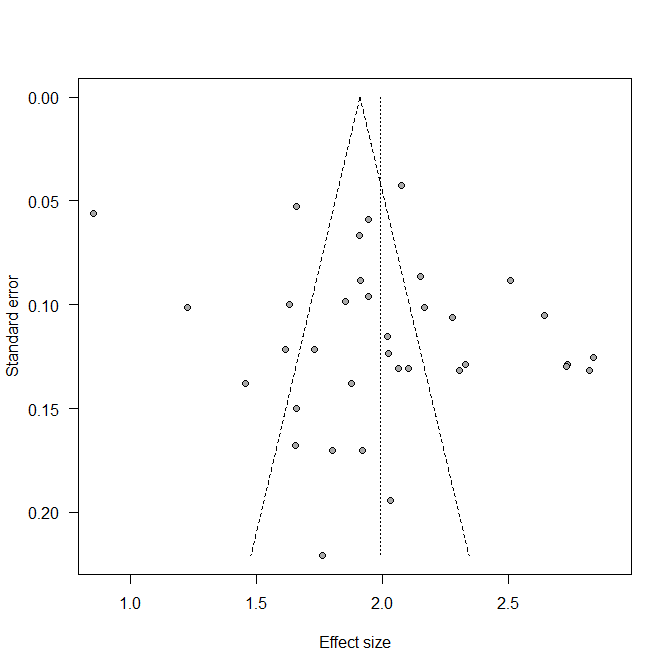

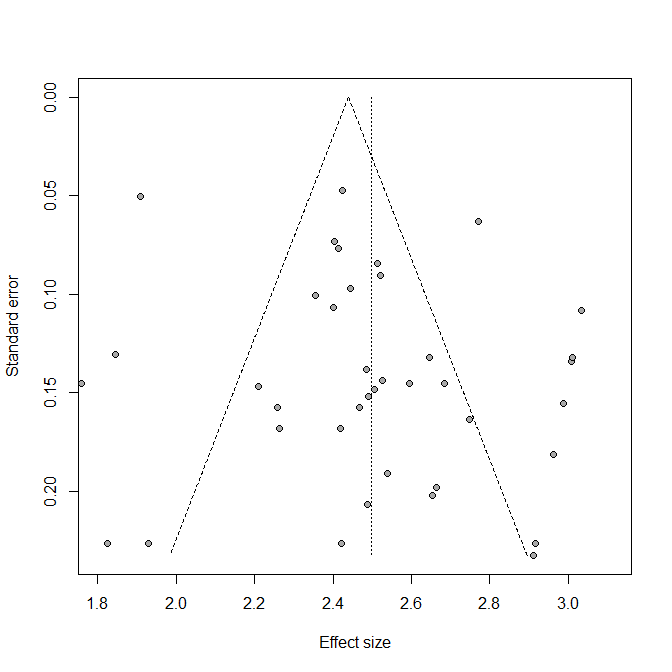


C
